# Supplementary material
Source: Springer Nature journal article supplement (https://www.springermedizin.de/resource/supplementary/13012_2010_449_MOESM1_ESM.pdf/9630106)
Supplement: MOESM1 [file 9630106]

# Acceptance and Use

Learnability

Willingness

Suitability

Satisfaction

Efficiency

Effectiveness
